# Supplementary material
Source: PubMed Central journal article supplement (PMC9188985)
Supplement: mmc3.pdf [file mmc3.pdf]

# Supplementary Information

## C Model comparison

After preprocessing the data, we compared the performance of 4 ensembles based on 4 types of base learners on the validation sets: Logistic Regression (LR), K-Nearest Neighbors (KNN), Support Vector Machine (SVM), and Light Gradient Boosting Model (LGBM). The models were compared using the AUROC and AUPRC and the results are shown in Table B. We selected the ensemble that achieved the highest AUROC on the validation set.

Table B: Performance comparison for the different ensembles on the validation sets. Best performance is shown in bold.

| Complication | Models | Validation Set A |       | Validation Set B |       |
|--------------|--------|------------------|-------|------------------|-------|
|              |        | AUROC            | AUPRC | AUROC            | AUPRC |
| SBI          | LR     | <b>0.895</b>     | 0.411 | <b>0.980</b>     | 0.596 |
|              | KNN    | 0.813            | 0.285 | 0.861            | 0.471 |
|              | SVM    | 0.853            | 0.321 | 0.965            | 0.543 |
|              | LGBM   | 0.888            | 0.382 | 0.934            | 0.395 |
| AKI          | LR     | <b>0.888</b>     | 0.411 | <b>0.892</b>     | 0.272 |
|              | KNN    | 0.777            | 0.234 | 0.770            | 0.166 |
|              | SVM    | 0.814            | 0.138 | 0.830            | 0.221 |
|              | LGBM   | 0.854            | 0.404 | 0.873            | 0.166 |
| ARDS         | LR     | <b>0.917</b>     | 0.379 | 0.942            | 0.396 |
|              | KNN    | 0.814            | 0.245 | 0.809            | 0.290 |
|              | SVM    | 0.868            | 0.217 | 0.921            | 0.412 |
|              | LGBM   | 0.912            | 0.352 | <b>0.949</b>     | 0.417 |
