# Supplementary material
Source: PubMed Central journal article supplement (PMC9188985)
Supplement: mmc4.pdf [file mmc4.pdf]

## TRIPOD Checklist: Prediction Model Development

| Section/Topic                | Item | Checklist Item                                                                                                                                                                                        | Page              |
|------------------------------|------|-------------------------------------------------------------------------------------------------------------------------------------------------------------------------------------------------------|-------------------|
| <b>Title and abstract</b>    |      |                                                                                                                                                                                                       |                   |
| Title                        | 1    | Identify the study as developing and/or validating a multivariable prediction model, the target population, and the outcome to be predicted.                                                          | 1                 |
| Abstract                     | 2    | Provide a summary of objectives, study design, setting, participants, sample size, predictors, outcome, statistical analysis, results, and conclusions.                                               | 1                 |
| <b>Introduction</b>          |      |                                                                                                                                                                                                       |                   |
| Background and objectives    | 3a   | Explain the medical context (including whether diagnostic or prognostic) and rationale for developing or validating the multivariable prediction model, including references to existing models.      | 2-3               |
|                              | 3b   | Specify the objectives, including whether the study describes the development or validation of the model or both.                                                                                     | 2-3               |
| <b>Methods</b>               |      |                                                                                                                                                                                                       |                   |
| Source of data               | 4a   | Describe the study design or source of data (e.g., randomized trial, cohort, or registry data), separately for the development and validation data sets, if applicable.                               | 3-4               |
|                              | 4b   | Specify the key study dates, including start of accrual; end of accrual; and, if applicable, end of follow-up.                                                                                        | 3-4               |
| Participants                 | 5a   | Specify key elements of the study setting (e.g., primary care, secondary care, general population) including number and location of centres.                                                          | 3-4               |
|                              | 5b   | Describe eligibility criteria for participants.                                                                                                                                                       | 3-4               |
|                              | 5c   | Give details of treatments received, if relevant.                                                                                                                                                     | N/A               |
| Outcome                      | 6a   | Clearly define the outcome that is predicted by the prediction model, including how and when assessed.                                                                                                | 4-5               |
|                              | 6b   | Report any actions to blind assessment of the outcome to be predicted.                                                                                                                                | N/A               |
| Predictors                   | 7a   | Clearly define all predictors used in developing or validating the multivariable prediction model, including how and when they were measured.                                                         | 4-5               |
|                              | 7b   | Report any actions to blind assessment of predictors for the outcome and other predictors.                                                                                                            | N/A               |
| Sample size                  | 8    | Explain how the study size was arrived at.                                                                                                                                                            | 3-4               |
| Missing data                 | 9    | Describe how missing data were handled (e.g., complete-case analysis, single imputation, multiple imputation) with details of any imputation method.                                                  | 5                 |
| Statistical analysis methods | 10a  | Describe how predictors were handled in the analyses.                                                                                                                                                 | 5-6               |
|                              | 10b  | Specify type of model, all model-building procedures (including any predictor selection), and method for internal validation.                                                                         | 5-6               |
|                              | 10d  | Specify all measures used to assess model performance and, if relevant, to compare multiple models.                                                                                                   | 6                 |
| Risk groups                  | 11   | Provide details on how risk groups were created, if done.                                                                                                                                             | N/A               |
| <b>Results</b>               |      |                                                                                                                                                                                                       |                   |
| Participants                 | 13a  | Describe the flow of participants through the study, including the number of participants with and without the outcome and, if applicable, a summary of the follow-up time. A diagram may be helpful. | 3-4,6-7           |
|                              | 13b  | Describe the characteristics of the participants (basic demographics, clinical features, available predictors), including the number of participants with missing data for predictors and outcome.    | 3-4,6-7           |
| Model development            | 14a  | Specify the number of participants and outcome events in each analysis.                                                                                                                               | 6-7               |
|                              | 14b  | If done, report the unadjusted association between each candidate predictor and outcome.                                                                                                              | N/A               |
| Model specification          | 15a  | Present the full prediction model to allow predictions for individuals (i.e., all regression coefficients, and model intercept or baseline survival at a given time point).                           | GitHub repository |

|                           |     |                                                                                                                                                    |                   |
|---------------------------|-----|----------------------------------------------------------------------------------------------------------------------------------------------------|-------------------|
|                           | 15b | Explain how to use the prediction model.                                                                                                           | Github repository |
| Model performance         | 16  | Report performance measures (with CIs) for the prediction model.                                                                                   | 8                 |
| <b>Discussion</b>         |     |                                                                                                                                                    |                   |
| Limitations               | 18  | Discuss any limitations of the study (such as nonrepresentative sample, few events per predictor, missing data).                                   | 9-11              |
| Interpretation            | 19b | Give an overall interpretation of the results, considering objectives, limitations, and results from similar studies, and other relevant evidence. | 9-11              |
| Implications              | 20  | Discuss the potential clinical use of the model and implications for future research.                                                              | 9-11              |
| <b>Other information</b>  |     |                                                                                                                                                    |                   |
| Supplementary information | 21  | Provide information about the availability of supplementary resources, such as study protocol, Web calculator, and data sets.                      | 12                |
| Funding                   | 22  | Give the source of funding and the role of the funders for the present study.                                                                      | 12                |
